# Supplementary material for: A Deterministic Analysis of Genome Integrity during Neoplastic Growth in Drosophila
Source: PubMed Central journal article supplement (PMC3916295; doi:10.1371/journal.pone.0087090), 2014-02-06
Supplement: pone.0087090.s012.pdf [file pone.0087090.s012.pdf]

Supporting Information for:  
 “A deterministic analysis of genome integrity during neoplastic  
 growth in *Drosophila*”

Table S1

Cem Sievers<sup>1</sup>, Federico Comoglio<sup>1</sup>, Makiko Seimiya<sup>1</sup>, Gunter Merdes<sup>1,\*</sup> and Renato Paro<sup>1,2,\*</sup>

<sup>1</sup>Department of Biosystems Science and Engineering, Swiss Federal Institute of Technology Zurich,  
 Mattenstrasse 26, 4058 Basel, Switzerland

<sup>2</sup>Faculty of Science, University of Basel, Klingelbergstrasse 50, 4056 Basel, Switzerland

July 12, 2013

| no.                                | chr | pos      | strand | w  | conc.<br>coverage | CDS<br>location | Gene ID     | Consequence   |
|------------------------------------|-----|----------|--------|----|-------------------|-----------------|-------------|---------------|
| <b>Tumor specific insertions</b>   |     |          |        |    |                   |                 |             |               |
| 1                                  | 2L  | 4123376  | +      | 4  | 26                | 1426            | FBgn0014033 | nonsynonymous |
| 2                                  | 2L  | 13272831 | +      | 5  | 2                 | 1286            | FBgn0032497 | nonsynonymous |
| 3                                  | 2L  | 13272831 | +      | 5  | 2                 | 1517            | FBgn0032497 | nonsynonymous |
| 4                                  | 2L  | 13272831 | +      | 5  | 2                 | 1286            | FBgn0032497 | nonsynonymous |
| 5                                  | 2L  | 13272831 | +      | 5  | 2                 | 1286            | FBgn0032497 | nonsynonymous |
| 6                                  | 2L  | 13272831 | +      | 5  | 2                 | 1286            | FBgn0032497 | nonsynonymous |
| 7                                  | 2L  | 13272831 | +      | 5  | 2                 | 1517            | FBgn0032497 | nonsynonymous |
| 8                                  | 2L  | 13272831 | +      | 5  | 2                 | 1517            | FBgn0032497 | nonsynonymous |
| 9                                  | 2L  | 13272831 | +      | 5  | 2                 | 1517            | FBgn0032497 | nonsynonymous |
| 10                                 | 2L  | 13272831 | +      | 5  | 2                 | 1517            | FBgn0032497 | nonsynonymous |
| 11                                 | 2L  | 16658075 | +      | 5  | 11                | 2492            | FBgn0259735 | nonsynonymous |
| 12                                 | 2L  | 16658075 | +      | 5  | 11                | 1586            | FBgn0259735 | nonsynonymous |
| 13                                 | 2L  | 16658075 | +      | 5  | 11                | 539             | FBgn0259735 | nonsynonymous |
| 14                                 | 2L  | 12498706 | -      | 6  | 26                | 64              | FBgn0259176 | nonsynonymous |
| 15                                 | 2L  | 16728782 | -      | 6  | 17                | 283             | FBgn0051782 | frameshift    |
| 16                                 | 2L  | 16728782 | -      | 6  | 17                | 283             | FBgn0051782 | frameshift    |
| 17                                 | 2R  | 7613207  | +      | 5  | 81                | 1703            | FBgn0033649 | nonsynonymous |
| 18                                 | 2R  | 12957513 | -      | 13 | 20                | 1195            | FBgn0050460 | nonsynonymous |
| 19                                 | 2R  | 12957513 | -      | 13 | 20                | 1549            | FBgn0050460 | nonsynonymous |
| 20                                 | 2R  | 12957513 | -      | 13 | 20                | 1549            | FBgn0050460 | nonsynonymous |
| 21                                 | 2R  | 12957513 | -      | 13 | 20                | 2593            | FBgn0050460 | nonsynonymous |
| 22                                 | 2R  | 12957513 | -      | 13 | 20                | 2386            | FBgn0050460 | nonsynonymous |
| 23                                 | 2R  | 12957513 | -      | 13 | 20                | 2122            | FBgn0050460 | nonsynonymous |
| 24                                 | 2R  | 12957513 | -      | 13 | 20                | 1195            | FBgn0050460 | nonsynonymous |
| 25                                 | 2R  | 13565884 | -      | 5  | 19                | 26              | FBgn0016059 | nonsynonymous |
| 26                                 | 2R  | 13565884 | -      | 5  | 19                | 26              | FBgn0016059 | nonsynonymous |
| 27                                 | 2R  | 13565884 | -      | 5  | 19                | 26              | FBgn0016059 | nonsynonymous |
| 28                                 | 2R  | 19301143 | -      | 4  | 4                 | 555             | FBgn0034860 | nonsynonymous |
| 29                                 | 3L  | 9830341  | -      | 5  | 6                 | 1303            | FBgn0015618 | nonsynonymous |
| 30                                 | 3L  | 16918205 | -      | 5  | 11                | 880             | FBgn0036677 | nonsynonymous |
| 31                                 | 3R  | 13956507 | +      | 14 | 7                 | 1865            | FBgn0003499 | nonsynonymous |
| 32                                 | 3R  | 13956507 | +      | 14 | 7                 | 1025            | FBgn0003499 | nonsynonymous |
| 33                                 | 3R  | 22457957 | +      | 4  | 10                | 305             | FBgn0039441 | nonsynonymous |
| 34                                 | 3R  | 25705079 | +      | 5  | 12                | 986             | FBgn0051038 | nonsynonymous |
| 35                                 | 3R  | 25705079 | +      | 5  | 12                | 986             | FBgn0051038 | nonsynonymous |
| 36                                 | 3R  | 25705079 | +      | 5  | 12                | 986             | FBgn0051038 | nonsynonymous |
| 37                                 | 3R  | 25705079 | +      | 5  | 12                | 986             | FBgn0051038 | nonsynonymous |
| 38                                 | 3R  | 25705079 | +      | 5  | 12                | 986             | FBgn0051038 | nonsynonymous |
| 39                                 | 3R  | 10130741 | -      | 14 | 36                | 2615            | FBgn0003567 | nonsynonymous |
| 40                                 | 3R  | 10130741 | -      | 14 | 36                | 2615            | FBgn0003567 | nonsynonymous |
| 41                                 | 3R  | 17168761 | -      | 14 | 2                 | 109             | FBgn0038881 | nonsynonymous |
| 42                                 | X   | 5847916  | +      | 5  | 1                 | 962             | FBgn0029827 | nonsynonymous |
| 43                                 | X   | 12338985 | +      | 9  | 34                | 1755            | FBgn0259680 | nonsynonymous |
| 44                                 | X   | 5892506  | -      | 13 | 31                | 1107            | FBgn0027546 | frameshift    |
| <b>Control specific insertions</b> |     |          |        |    |                   |                 |             |               |

Continued on next page

| no. | chr | pos      | strand | w  | conc.<br>coverage | CDS<br>location | Gene ID     | Consequence    |
|-----|-----|----------|--------|----|-------------------|-----------------|-------------|----------------|
| 1   | 2L  | 1606970  | +      | 4  | 4                 | 3304            | FBgn0261509 | nonsynonymous  |
| 2   | 2L  | 4815259  | +      | 14 | 68                | 511             | FBgn0031630 | frameshift     |
| 3   | 2L  | 4865387  | +      | 12 | 29                | 85              | FBgn0051660 | nonsynonymous  |
| 4   | 2L  | 4865387  | +      | 12 | 29                | 85              | FBgn0051660 | nonsynonymous  |
| 5   | 2L  | 8175364  | +      | 8  | 25                | 1236            | FBgn0031993 | nonsynonymous  |
| 6   | 2L  | 8175364  | +      | 8  | 25                | 1236            | FBgn0031993 | nonsynonymous  |
| 7   | 2L  | 8175364  | +      | 8  | 25                | 1236            | FBgn0031993 | nonsynonymous  |
| 8   | 2L  | 8427730  | +      | 7  | 11                | 695             | FBgn0027932 | nonsynonymous  |
| 9   | 2L  | 8427730  | +      | 7  | 11                | 695             | FBgn0027932 | nonsynonymous  |
| 10  | 2L  | 8427730  | +      | 7  | 11                | 695             | FBgn0027932 | nonsynonymous  |
| 11  | 2L  | 8427730  | +      | 7  | 11                | 695             | FBgn0027932 | nonsynonymous  |
| 12  | 2L  | 10055698 | +      | 5  | 19                | 849             | FBgn0053302 | nonsynonymous  |
| 13  | 2L  | 10055698 | +      | 5  | 19                | 849             | FBgn0053302 | nonsynonymous  |
| 14  | 2L  | 561604   | -      | 6  | 30                | 1578            | FBgn0031264 | nonsynonymous  |
| 15  | 2L  | 7499027  | -      | 7  | 38                | 2386            | FBgn0085403 | nonsynonymous  |
| 16  | 2L  | 7499027  | -      | 7  | 38                | 2551            | FBgn0085403 | nonsynonymous  |
| 17  | 2L  | 7499027  | -      | 7  | 38                | 2629            | FBgn0085403 | nonsynonymous  |
| 18  | 2L  | 7499027  | -      | 7  | 38                | 2800            | FBgn0085403 | nonsynonymous  |
| 19  | 2L  | 10068904 | -      | 8  | 8                 | 2770            | FBgn0032180 | not translated |
| 20  | 2L  | 12537098 | -      | 4  | 19                | 2278            | FBgn0259176 | nonsynonymous  |
| 21  | 2L  | 12537098 | -      | 4  | 19                | 1951            | FBgn0259176 | nonsynonymous  |
| 22  | 2L  | 12537098 | -      | 4  | 19                | 1951            | FBgn0259176 | nonsynonymous  |
| 23  | 2L  | 16339684 | -      | 13 | 1                 | 568             | FBgn0259151 | nonsynonymous  |
| 24  | 2L  | 18131278 | -      | 6  | 51                | 3930            | FBgn0001301 | nonsynonymous  |
| 25  | 2L  | 18533680 | -      | 6  | 51                | 4011            | FBgn0085370 | nonsynonymous  |
| 26  | 2L  | 18533680 | -      | 6  | 51                | 3879            | FBgn0085370 | nonsynonymous  |
| 27  | 2L  | 19756028 | -      | 4  | 41                | 493             | FBgn0032817 | nonsynonymous  |
| 28  | 2R  | 2123376  | +      | 12 | 5                 | 1720            | FBgn0033073 | nonsynonymous  |
| 29  | 2R  | 2123376  | +      | 12 | 5                 | 1720            | FBgn0033073 | nonsynonymous  |
| 30  | 2R  | 2839661  | +      | 5  | 3                 | 1354            | FBgn0053349 | frameshift     |
| 31  | 2R  | 6498338  | +      | 13 | 29                | 599             | FBgn0004399 | nonsynonymous  |
| 32  | 2R  | 6498338  | +      | 13 | 29                | 599             | FBgn0004399 | nonsynonymous  |
| 33  | 2R  | 6498338  | +      | 13 | 29                | 599             | FBgn0004399 | nonsynonymous  |
| 34  | 2R  | 6498338  | +      | 13 | 29                | 599             | FBgn0004399 | nonsynonymous  |
| 35  | 2R  | 9926702  | +      | 4  | 0                 | 1184            | FBgn0002643 | nonsynonymous  |
| 36  | 2R  | 9926702  | +      | 4  | 0                 | 1184            | FBgn0002643 | nonsynonymous  |
| 37  | 2R  | 9926702  | +      | 4  | 0                 | 500             | FBgn0002643 | nonsynonymous  |
| 38  | 2R  | 9926702  | +      | 4  | 0                 | 1184            | FBgn0002643 | nonsynonymous  |
| 39  | 2R  | 9926702  | +      | 4  | 0                 | 1184            | FBgn0002643 | nonsynonymous  |
| 40  | 2R  | 9926702  | +      | 4  | 0                 | 500             | FBgn0002643 | nonsynonymous  |
| 41  | 2R  | 9927618  | +      | 13 | 1                 | 2100            | FBgn0002643 | nonsynonymous  |
| 42  | 2R  | 9927618  | +      | 13 | 1                 | 2100            | FBgn0002643 | nonsynonymous  |
| 43  | 2R  | 10393244 | +      | 6  | 10                | 425             | FBgn0000142 | nonsynonymous  |
| 44  | 2R  | 10393244 | +      | 6  | 10                | 425             | FBgn0000142 | nonsynonymous  |
| 45  | 2R  | 13708702 | +      | 6  | 2                 | 1442            | FBgn0259211 | nonsynonymous  |
| 46  | 2R  | 13708702 | +      | 6  | 2                 | 1442            | FBgn0259211 | nonsynonymous  |
| 47  | 2R  | 13708702 | +      | 6  | 2                 | 1442            | FBgn0259211 | nonsynonymous  |
| 48  | 2R  | 13708702 | +      | 6  | 2                 | 1442            | FBgn0259211 | nonsynonymous  |
| 49  | 2R  | 13708702 | +      | 6  | 2                 | 605             | FBgn0259211 | nonsynonymous  |
| 50  | 2R  | 19234281 | +      | 7  | 20                | 91              | FBgn0034846 | nonsynonymous  |
| 51  | 2R  | 19344868 | +      | 4  | 10                | 856             | FBgn0034862 | nonsynonymous  |
| 52  | 2R  | 4999721  | -      | 8  | 39                | 1594            | FBgn0033379 | nonsynonymous  |
| 53  | 2R  | 9809208  | -      | 6  | 42                | 274             | FBgn0013733 | nonsynonymous  |
| 54  | 2R  | 9809208  | -      | 6  | 42                | 274             | FBgn0013733 | nonsynonymous  |
| 55  | 2R  | 9809208  | -      | 6  | 42                | 274             | FBgn0013733 | nonsynonymous  |
| 56  | 2R  | 9809208  | -      | 6  | 42                | 274             | FBgn0013733 | nonsynonymous  |
| 57  | 2R  | 9809208  | -      | 6  | 42                | 274             | FBgn0013733 | nonsynonymous  |
| 58  | 2R  | 10563402 | -      | 14 | 48                | 2192            | FBgn0050480 | nonsynonymous  |
| 59  | 2R  | 12072760 | -      | 8  | 54                | 671             | FBgn0034086 | nonsynonymous  |
| 60  | 2R  | 12754881 | -      | 15 | 40                | 22              | FBgn0014870 | nonsynonymous  |
| 61  | 2R  | 12754881 | -      | 15 | 40                | 22              | FBgn0014870 | nonsynonymous  |
| 62  | 2R  | 14064130 | -      | 13 | 41                | 1756            | FBgn0034313 | nonsynonymous  |
| 63  | 2R  | 16717771 | -      | 11 | 13                | 105             | FBgn0016984 | nonsynonymous  |
| 64  | 2R  | 18232414 | -      | 6  | 0                 | 499             | FBgn0034720 | nonsynonymous  |
| 65  | 2R  | 18232414 | -      | 6  | 0                 | 112             | FBgn0034720 | nonsynonymous  |
| 66  | 2R  | 18232414 | -      | 6  | 0                 | 112             | FBgn0034720 | nonsynonymous  |
| 67  | 2R  | 18232414 | -      | 6  | 0                 | 112             | FBgn0034720 | nonsynonymous  |
| 68  | 3L  | 1240112  | +      | 8  | 36                | 875             | FBgn0035192 | nonsynonymous  |
| 69  | 3L  | 1822468  | +      | 15 | 0                 | 576             | FBgn0027790 | nonsynonymous  |
| 70  | 3L  | 1822468  | +      | 15 | 0                 | 576             | FBgn0027790 | nonsynonymous  |
| 71  | 3L  | 4418395  | +      | 8  | 24                | 274             | FBgn0035542 | nonsynonymous  |
| 72  | 3L  | 4418395  | +      | 8  | 24                | 274             | FBgn0035542 | nonsynonymous  |
| 73  | 3L  | 4418395  | +      | 8  | 24                | 274             | FBgn0035542 | nonsynonymous  |
| 74  | 3L  | 4418395  | +      | 8  | 24                | 274             | FBgn0035542 | nonsynonymous  |
| 75  | 3L  | 5875817  | +      | 8  | 39                | 311             | FBgn0035643 | nonsynonymous  |
| 76  | 3L  | 6073466  | +      | 7  | 11                | 1694            | FBgn0035676 | nonsynonymous  |
| 77  | 3L  | 8406175  | +      | 7  | 70                | 1               | FBgn0010431 | frameshift     |
| 78  | 3L  | 9605816  | +      | 8  | 28                | 4861            | FBgn0036017 | nonsynonymous  |
| 79  | 3L  | 10625324 | +      | 6  | 0                 | 757             | FBgn0001179 | nonsynonymous  |
| 80  | 3L  | 10625324 | +      | 6  | 0                 | 757             | FBgn0001179 | nonsynonymous  |
| 81  | 3L  | 10863287 | +      | 5  | 18                | 365             | FBgn0026160 | nonsynonymous  |

Continued on next page

| no. | chr | pos      | strand | w  | conc.<br>coverage | CDS<br>location | Gene ID     | Consequence    |
|-----|-----|----------|--------|----|-------------------|-----------------|-------------|----------------|
| 82  | 3L  | 10863287 | +      | 5  | 18                | 212             | FBgn0026160 | nonsynonymous  |
| 83  | 3L  | 10863287 | +      | 5  | 18                | 134             | FBgn0026160 | nonsynonymous  |
| 84  | 3L  | 10863287 | +      | 5  | 18                | 254             | FBgn0026160 | nonsynonymous  |
| 85  | 3L  | 16126942 | +      | 5  | 45                | 1106            | FBgn0036574 | nonsynonymous  |
| 86  | 3L  | 16126942 | +      | 5  | 45                | 1274            | FBgn0036574 | nonsynonymous  |
| 87  | 3L  | 20314180 | +      | 7  | 0                 | 40              | FBgn0036969 | nonsynonymous  |
| 88  | 3L  | 1614435  | -      | 5  | 4                 | 1141            | FBgn0035241 | nonsynonymous  |
| 89  | 3L  | 6724446  | -      | 10 | 0                 | 6523            | FBgn0052394 | nonsynonymous  |
| 90  | 3L  | 6725070  | -      | 4  | 39                | 5899            | FBgn0052394 | nonsynonymous  |
| 91  | 3L  | 10874714 | -      | 8  | 26                | 261             | FBgn0036106 | nonsynonymous  |
| 92  | 3L  | 11605144 | -      | 5  | 6                 | 8029            | FBgn0036181 | nonsynonymous  |
| 93  | 3L  | 11605144 | -      | 5  | 6                 | 8029            | FBgn0036181 | nonsynonymous  |
| 94  | 3L  | 11605144 | -      | 5  | 6                 | 8029            | FBgn0036181 | not translated |
| 95  | 3L  | 11957416 | -      | 7  | 5                 | 436             | FBgn0028573 | nonsynonymous  |
| 96  | 3L  | 18051679 | -      | 4  | 15                | 1006            | FBgn0000568 | nonsynonymous  |
| 97  | 3L  | 19457494 | -      | 7  | 5                 | 227             | FBgn0036870 | nonsynonymous  |
| 98  | 3R  | 11686678 | +      | 12 | 5                 | 609             | FBgn0038377 | nonsynonymous  |
| 99  | 3R  | 11686678 | +      | 12 | 5                 | 441             | FBgn0038377 | nonsynonymous  |
| 100 | 3R  | 12914780 | +      | 13 | 28                | 600             | FBgn0038478 | nonsynonymous  |
| 101 | 3R  | 13241887 | +      | 4  | 51                | 420             | FBgn0038508 | nonsynonymous  |
| 102 | 3R  | 14994010 | +      | 4  | 9                 | 254             | FBgn0010768 | nonsynonymous  |
| 103 | 3R  | 20840647 | +      | 4  | 13                | 2108            | FBgn0039257 | nonsynonymous  |
| 104 | 3R  | 21083465 | +      | 8  | 44                | 7343            | FBgn0039302 | nonsynonymous  |
| 105 | 3R  | 21488552 | +      | 11 | 49                | 269             | FBgn0039352 | nonsynonymous  |
| 106 | 3R  | 23166484 | +      | 10 | 14                | 141             | FBgn0260487 | nonsynonymous  |
| 107 | 3R  | 25816088 | +      | 6  | 18                | 4007            | FBgn0039728 | nonsynonymous  |
| 108 | 3R  | 25878899 | +      | 7  | 4                 | 379             | FBgn0039743 | nonsynonymous  |
| 109 | 3R  | 26600166 | +      | 5  | 0                 | 719             | FBgn0004606 | nonsynonymous  |
| 110 | 3R  | 1001248  | -      | 12 | 21                | 4073            | FBgn0259212 | nonsynonymous  |
| 111 | 3R  | 1001248  | -      | 12 | 21                | 4580            | FBgn0259212 | nonsynonymous  |
| 112 | 3R  | 4662727  | -      | 5  | 37                | 3925            | FBgn0003177 | nonsynonymous  |
| 113 | 3R  | 4844180  | -      | 5  | 49                | 1225            | FBgn0015014 | nonsynonymous  |
| 114 | 3R  | 5070096  | -      | 11 | 83                | 1126            | FBgn0260935 | nonsynonymous  |
| 115 | 3R  | 5070096  | -      | 11 | 83                | 1126            | FBgn0260935 | nonsynonymous  |
| 116 | 3R  | 7991171  | -      | 5  | 26                | 102             | FBgn0010218 | nonsynonymous  |
| 117 | 3R  | 7991171  | -      | 5  | 26                | 102             | FBgn0010218 | nonsynonymous  |
| 118 | 3R  | 8817865  | -      | 4  | 88                | 750             | FBgn0041710 | frameshift     |
| 119 | 3R  | 10355217 | -      | 6  | 21                | 297             | FBgn0038237 | nonsynonymous  |
| 120 | 3R  | 17544783 | -      | 4  | 21                | 280             | FBgn0051176 | nonsynonymous  |
| 121 | 3R  | 17911474 | -      | 4  | 5                 | 205             | FBgn0038930 | nonsynonymous  |
| 122 | 3R  | 17911474 | -      | 4  | 5                 | 205             | FBgn0038930 | nonsynonymous  |
| 123 | X   | 3185386  | +      | 7  | 0                 | 135             | FBgn0000479 | nonsynonymous  |
| 124 | X   | 5803091  | +      | 11 | 0                 | 458             | FBgn0029822 | nonsynonymous  |
| 125 | X   | 5803091  | +      | 11 | 0                 | 458             | FBgn0029822 | nonsynonymous  |
| 126 | X   | 5803092  | +      | 4  | 0                 | 459             | FBgn0029822 | nonsynonymous  |
| 127 | X   | 5803092  | +      | 4  | 0                 | 459             | FBgn0029822 | nonsynonymous  |
| 128 | X   | 5844435  | +      | 4  | 46                | 27              | FBgn0052755 | nonsynonymous  |
| 129 | X   | 8373585  | +      | 11 | 5                 | 107             | FBgn0000359 | nonsynonymous  |
| 130 | X   | 9504258  | +      | 8  | 13                | 860             | FBgn0030144 | nonsynonymous  |
| 131 | X   | 17100970 | +      | 18 | 1                 | 463             | FBgn0052564 | nonsynonymous  |
| 132 | X   | 4138811  | -      | 6  | 0                 | 895             | FBgn0052774 | not translated |
| 133 | X   | 4138811  | -      | 6  | 0                 | 895             | FBgn0052774 | nonsynonymous  |
| 134 | X   | 6378991  | -      | 4  | 0                 | 109             | FBgn0259242 | nonsynonymous  |
| 135 | X   | 11822591 | -      | 33 | 11                | 1570            | FBgn0030358 | nonsynonymous  |
| 136 | X   | 12685720 | -      | 8  | 4                 | 4556            | FBgn0259171 | nonsynonymous  |
| 137 | X   | 14684787 | -      | 17 | 4                 | 5731            | FBgn0003301 | nonsynonymous  |
| 138 | X   | 21273590 | -      | 4  | 27                | 155             | FBgn0031176 | nonsynonymous  |
| 139 | X   | 21273590 | -      | 4  | 27                | 155             | FBgn0031176 | not translated |

End of the table
