# Supplementary material for: A Deterministic Analysis of Genome Integrity during Neoplastic Growth in Drosophila
Source: PubMed Central journal article supplement (PMC3916295; doi:10.1371/journal.pone.0087090), 2014-02-06
Supplement: pone.0087090.s013.pdf [file pone.0087090.s013.pdf]

Supporting Information for:  
 “A deterministic analysis of genome integrity during neoplastic  
 growth in *Drosophila*”

Table S2

Cem Sievers<sup>1</sup>, Federico Comoglio<sup>1</sup>, Makiko Seimiya<sup>1</sup>, Gunter Merdes<sup>1,\*</sup> and Renato Paro<sup>1,2,\*</sup>

<sup>1</sup>Department of Biosystems Science and Engineering, Swiss Federal Institute of Technology Zurich,  
 Mattenstrasse 26, 4058 Basel, Switzerland

<sup>2</sup>Faculty of Science, University of Basel, Klingelbergstrasse 50, 4056 Basel, Switzerland

July 12, 2013

| no.                             | chr | start    | end      | strand | w  | conc.<br>cov. 1 | conc.<br>cov. 2 | CDS<br>start | CDS<br>end | Gene ID     | Consequence   |
|---------------------------------|-----|----------|----------|--------|----|-----------------|-----------------|--------------|------------|-------------|---------------|
| <b>Tumor specific deletions</b> |     |          |          |        |    |                 |                 |              |            |             |               |
| 1                               | 2L  | 8184286  | 8184295  | +      | 16 | 0               | 0               | 5412         | 5421       | FBgn0031993 | nonsynonymous |
| 2                               | 2L  | 8184286  | 8184295  | +      | 16 | 0               | 0               | 5412         | 5421       | FBgn0031993 | nonsynonymous |
| 3                               | 2L  | 8184286  | 8184295  | +      | 16 | 0               | 0               | 5190         | 5199       | FBgn0031993 | nonsynonymous |
| 4                               | 2L  | 10648293 | 10648338 | +      | 7  | 11              | 11              | 1795         | 1840       | FBgn0032275 | nonsynonymous |
| 5                               | 2L  | 13777549 | 13777558 | +      | 7  | 13              | 13              | 341          | 350        | FBgn0051845 | nonsynonymous |
| 6                               | 2L  | 18991547 | 18991553 | +      | 16 | 25              | 26              | 473          | 479        | FBgn0032734 | nonsynonymous |
| 7                               | 2L  | 20771772 | 20771781 | +      | 4  | 1               | 1               | 665          | 674        | FBgn0000251 | nonsynonymous |
| 8                               | 2L  | 20771772 | 20771781 | +      | 4  | 1               | 1               | 665          | 674        | FBgn0000251 | nonsynonymous |
| 9                               | 2L  | 1499064  | 1499073  | -      | 14 | 9               | 9               | 799          | 808        | FBgn0031343 | nonsynonymous |
| 10                              | 2L  | 1499064  | 1499073  | -      | 14 | 9               | 9               | 916          | 925        | FBgn0031343 | nonsynonymous |
| 11                              | 2L  | 1499064  | 1499073  | -      | 14 | 9               | 9               | 916          | 925        | FBgn0031343 | nonsynonymous |
| 12                              | 2L  | 1499064  | 1499073  | -      | 14 | 9               | 9               | 799          | 808        | FBgn0031343 | nonsynonymous |
| 13                              | 2L  | 1499064  | 1499073  | -      | 14 | 9               | 9               | 1126         | 1135       | FBgn0031343 | nonsynonymous |
| 14                              | 2L  | 1499064  | 1499073  | -      | 14 | 9               | 9               | 1009         | 1018       | FBgn0031343 | nonsynonymous |
| 15                              | 2L  | 8447493  | 8447496  | -      | 4  | 55              | 54              | 1694         | 1697       | FBgn0027780 | nonsynonymous |
| 16                              | 2L  | 10831826 | 10831841 | -      | 16 | 4               | 6               | 87           | 102        | FBgn0011676 | nonsynonymous |
| 17                              | 2L  | 10831826 | 10831841 | -      | 16 | 4               | 6               | 87           | 102        | FBgn0011676 | nonsynonymous |
| 18                              | 2L  | 10831826 | 10831841 | -      | 16 | 4               | 6               | 87           | 102        | FBgn0011676 | nonsynonymous |
| 19                              | 2L  | 10831826 | 10831841 | -      | 16 | 4               | 6               | 87           | 102        | FBgn0011676 | nonsynonymous |
| 20                              | 2L  | 10831826 | 10831841 | -      | 16 | 4               | 6               | 87           | 102        | FBgn0011676 | nonsynonymous |
| 21                              | 2L  | 10831826 | 10831841 | -      | 16 | 4               | 6               | 87           | 102        | FBgn0011676 | nonsynonymous |
| 22                              | 2L  | 10831826 | 10831841 | -      | 16 | 4               | 6               | 87           | 102        | FBgn0011676 | nonsynonymous |
| 23                              | 2L  | 10831826 | 10831841 | -      | 16 | 4               | 6               | 87           | 102        | FBgn0011676 | nonsynonymous |
| 24                              | 2L  | 10831826 | 10831841 | -      | 16 | 4               | 6               | 87           | 102        | FBgn0011676 | nonsynonymous |
| 25                              | 2L  | 10831826 | 10831841 | -      | 16 | 4               | 6               | 87           | 102        | FBgn0011676 | nonsynonymous |
| 26                              | 2L  | 11821212 | 11821218 | -      | 4  | 9               | 8               | 67           | 73         | FBgn0259225 | nonsynonymous |
| 27                              | 2R  | 7096785  | 7096788  | +      | 20 | 2               | 2               | 1124         | 1127       | FBgn0003396 | nonsynonymous |
| 28                              | 2R  | 7096785  | 7096788  | +      | 20 | 2               | 2               | 989          | 992        | FBgn0003396 | nonsynonymous |
| 29                              | 2R  | 7096785  | 7096788  | +      | 20 | 2               | 2               | 989          | 992        | FBgn0003396 | nonsynonymous |
| 30                              | 2R  | 7096785  | 7096788  | +      | 20 | 2               | 2               | 989          | 992        | FBgn0003396 | nonsynonymous |
| 31                              | 2R  | 8357014  | 8357026  | +      | 24 | 12              | 12              | 695          | 707        | FBgn0033741 | nonsynonymous |
| 32                              | 2R  | 9848730  | 9848744  | +      | 19 | 0               | 0               | 32           | 46         | FBgn0013770 | frameshift    |
| 33                              | 2R  | 17537882 | 17537888 | +      | 4  | 12              | 12              | 152          | 158        | FBgn0034644 | nonsynonymous |
| 34                              | 2R  | 17537885 | 17537891 | +      | 6  | 12              | 12              | 155          | 161        | FBgn0034644 | nonsynonymous |
| 35                              | 2R  | 18708967 | 18709021 | +      | 4  | 0               | 5               | 1319         | 1373       | FBgn0050271 | nonsynonymous |
| 36                              | 2R  | 18708967 | 18709021 | +      | 4  | 0               | 5               | 1277         | 1331       | FBgn0050271 | nonsynonymous |
| 37                              | 2R  | 19956841 | 19956844 | +      | 8  | 43              | 42              | 119          | 122        | FBgn0034971 | nonsynonymous |
| 38                              | 2R  | 19956841 | 19956844 | +      | 8  | 43              | 42              | 119          | 122        | FBgn0034971 | nonsynonymous |
| 39                              | 2R  | 5604925  | 5604937  | -      | 16 | 3               | 2               | 1754         | 1766       | FBgn0259678 | nonsynonymous |
| 40                              | 2R  | 7865240  | 7865249  | -      | 4  | 61              | 66              | 1151         | 1160       | FBgn0050036 | nonsynonymous |
| 41                              | 2R  | 11863083 | 11863473 | -      | 6  | 5               | 0               | 9213         | 9603       | FBgn0013988 | nonsynonymous |
| 42                              | 2R  | 11863083 | 11863473 | -      | 6  | 5               | 0               | 9213         | 9603       | FBgn0013988 | nonsynonymous |
| 43                              | 2R  | 11863083 | 11863473 | -      | 6  | 5               | 0               | 9213         | 9603       | FBgn0013988 | nonsynonymous |
| 44                              | 2R  | 11863083 | 11863473 | -      | 6  | 5               | 0               | 9213         | 9603       | FBgn0013988 | nonsynonymous |
| 45                              | 2R  | 11863083 | 11863473 | -      | 6  | 5               | 0               | 9213         | 9603       | FBgn0013988 | nonsynonymous |
| 46                              | 2R  | 11863083 | 11863473 | -      | 6  | 5               | 0               | 9213         | 9603       | FBgn0013988 | nonsynonymous |

Continued on next page

| no.                               | chr | start    | end      | strand | w  | conc.<br>cov. 1 | conc.<br>cov. 2 | CDS<br>start | CDS<br>end | Gene ID     | Consequence   |
|-----------------------------------|-----|----------|----------|--------|----|-----------------|-----------------|--------------|------------|-------------|---------------|
| 47                                | 2R  | 11863083 | 11863473 | -      | 6  | 5               | 0               | 9213         | 9603       | FBgn0013988 | nonsynonymous |
| 48                                | 3L  | 547978   | 547981   | +      | 11 | 21              | 21              | 200          | 203        | FBgn0035142 | nonsynonymous |
| 49                                | 3L  | 547978   | 547981   | +      | 11 | 21              | 21              | 200          | 203        | FBgn0035142 | nonsynonymous |
| 50                                | 3L  | 12966418 | 12966429 | +      | 4  | 38              | 39              | 793          | 804        | FBgn0036328 | frameshift    |
| 51                                | 3L  | 15547518 | 15547536 | +      | 22 | 0               | 0               | 154          | 163        | FBgn0087035 | nonsynonymous |
| 52                                | 3L  | 15547518 | 15547536 | +      | 22 | 0               | 0               | 154          | 172        | FBgn0087035 | nonsynonymous |
| 53                                | 3L  | 1632311  | 1632317  | -      | 4  | 4               | 4               | 502          | 508        | FBgn0013342 | nonsynonymous |
| 54                                | 3L  | 1632311  | 1632317  | -      | 4  | 4               | 4               | 529          | 535        | FBgn0013342 | nonsynonymous |
| 55                                | 3L  | 1632311  | 1632317  | -      | 4  | 4               | 4               | 529          | 535        | FBgn0013342 | nonsense      |
| 56                                | 3L  | 1632311  | 1632317  | -      | 4  | 4               | 4               | 502          | 508        | FBgn0013342 | nonsynonymous |
| 57                                | 3L  | 3113605  | 3113608  | -      | 21 | 25              | 24              | 450          | 453        | FBgn0035399 | nonsynonymous |
| 58                                | 3L  | 3113605  | 3113608  | -      | 21 | 25              | 24              | 450          | 453        | FBgn0035399 | nonsynonymous |
| 59                                | 3L  | 8428759  | 8428768  | -      | 5  | 59              | 61              | 2041         | 2050       | FBgn0035895 | nonsynonymous |
| 60                                | 3L  | 8428759  | 8428768  | -      | 5  | 59              | 61              | 2095         | 2104       | FBgn0035895 | nonsynonymous |
| 61                                | 3L  | 14744702 | 14744705 | -      | 12 | 1               | 0               | 1303         | 1306       | FBgn0013263 | nonsynonymous |
| 62                                | 3L  | 14744702 | 14744705 | -      | 12 | 1               | 0               | 1303         | 1306       | FBgn0013263 | nonsynonymous |
| 63                                | 3L  | 14744702 | 14744705 | -      | 12 | 1               | 0               | 1303         | 1306       | FBgn0013263 | nonsynonymous |
| 64                                | 3L  | 16359690 | 16359714 | -      | 7  | 5               | 6               | 695          | 719        | FBgn0036619 | nonsynonymous |
| 65                                | 3L  | 16918216 | 16918234 | -      | 5  | 11              | 10              | 851          | 869        | FBgn0036677 | nonsynonymous |
| 66                                | 3L  | 19251137 | 19251155 | -      | 5  | 75              | 75              | 1450         | 1468       | FBgn0026630 | nonsynonymous |
| 67                                | 3L  | 19251137 | 19251155 | -      | 5  | 75              | 75              | 1450         | 1468       | FBgn0026630 | nonsynonymous |
| 68                                | 3L  | 19251137 | 19251155 | -      | 5  | 75              | 75              | 1450         | 1468       | FBgn0026630 | nonsynonymous |
| 69                                | 3L  | 19457482 | 19457494 | -      | 4  | 0               | 1               | 227          | 239        | FBgn0036870 | nonsynonymous |
| 70                                | 3R  | 8244861  | 8244864  | +      | 6  | 18              | 18              | 4531         | 4534       | FBgn0082831 | nonsynonymous |
| 71                                | 3R  | 9528527  | 9528553  | +      | 4  | 47              | 47              | 1669         | 1695       | FBgn0002937 | frameshift    |
| 72                                | 3R  | 11865828 | 11865834 | +      | 4  | 3               | 3               | 1261         | 1267       | FBgn0003117 | nonsynonymous |
| 73                                | 3R  | 11865828 | 11865834 | +      | 4  | 3               | 3               | 1417         | 1423       | FBgn0003117 | nonsynonymous |
| 74                                | 3R  | 17714948 | 17714951 | +      | 4  | 20              | 20              | 1069         | 1072       | FBgn0038917 | nonsynonymous |
| 75                                | 3R  | 20064585 | 20064588 | +      | 4  | 2               | 2               | 3608         | 3611       | FBgn0043884 | nonsynonymous |
| 76                                | 3R  | 20064585 | 20064588 | +      | 4  | 2               | 2               | 3608         | 3611       | FBgn0043884 | nonsynonymous |
| 77                                | 3R  | 23533603 | 23533609 | +      | 6  | 15              | 14              | 614          | 620        | FBgn0039544 | nonsynonymous |
| 78                                | 3R  | 23533603 | 23533609 | +      | 6  | 15              | 14              | 614          | 620        | FBgn0039544 | nonsynonymous |
| 79                                | 3R  | 4660287  | 4660299  | -      | 12 | 5               | 4               | 2743         | 2755       | FBgn0003177 | nonsynonymous |
| 80                                | 3R  | 4660287  | 4660299  | -      | 12 | 5               | 4               | 2743         | 2755       | FBgn0003177 | nonsynonymous |
| 81                                | 3R  | 4660287  | 4660299  | -      | 12 | 5               | 4               | 2743         | 2755       | FBgn0003177 | nonsynonymous |
| 82                                | 3R  | 4660287  | 4660299  | -      | 12 | 5               | 4               | 3022         | 3034       | FBgn0003177 | nonsynonymous |
| 83                                | 3R  | 4660287  | 4660299  | -      | 12 | 5               | 4               | 2977         | 2989       | FBgn0003177 | nonsynonymous |
| 84                                | 3R  | 4660287  | 4660299  | -      | 12 | 5               | 4               | 4069         | 4081       | FBgn0003177 | nonsynonymous |
| 85                                | 3R  | 4660287  | 4660299  | -      | 12 | 5               | 4               | 2977         | 2989       | FBgn0003177 | nonsynonymous |
| 86                                | 3R  | 8467809  | 8467818  | -      | 10 | 19              | 20              | 9            | 18         | FBgn0038070 | nonsynonymous |
| 87                                | 3R  | 9807529  | 9807538  | -      | 5  | 2               | 2               | 1110         | 1119       | FBgn0086364 | nonsynonymous |
| 88                                | 3R  | 10170736 | 10170739 | -      | 8  | 13              | 13              | 154          | 157        | FBgn0024321 | nonsynonymous |
| 89                                | 3R  | 10170736 | 10170739 | -      | 8  | 13              | 13              | 154          | 157        | FBgn0024321 | nonsynonymous |
| 90                                | 3R  | 13731107 | 13731110 | -      | 6  | 4               | 4               | 961          | 964        | FBgn0053547 | nonsynonymous |
| 91                                | 3R  | 17677519 | 17677525 | -      | 4  | 27              | 28              | 594          | 600        | FBgn0015229 | nonsynonymous |
| 92                                | 3R  | 18251484 | 18251490 | -      | 15 | 18              | 19              | 2154         | 2160       | FBgn0038967 | nonsynonymous |
| 93                                | 3R  | 24439393 | 24439394 | -      | 10 | 31              | 31              | 2355         | 2356       | FBgn0039590 | frameshift    |
| 94                                | X   | 5803361  | 5803367  | +      | 12 | 0               | 0               | 728          | 734        | FBgn0029822 | nonsynonymous |
| 95                                | X   | 5803361  | 5803367  | +      | 12 | 0               | 0               | 728          | 734        | FBgn0029822 | nonsynonymous |
| 96                                | X   | 9038661  | 9038670  | +      | 6  | 24              | 25              | 1761         | 1770       | FBgn0030091 | nonsynonymous |
| 97                                | X   | 9773019  | 9773043  | +      | 14 | 1               | 3               | 420          | 444        | FBgn0030157 | nonsynonymous |
| 98                                | X   | 10117254 | 10117257 | +      | 7  | 0               | 0               | 1396         | 1399       | FBgn0085437 | nonsynonymous |
| 99                                | X   | 10117254 | 10117257 | +      | 7  | 0               | 0               | 97           | 100        | FBgn0085437 | nonsynonymous |
| 100                               | X   | 7583167  | 7583170  | -      | 10 | 3               | 4               | 859          | 862        | FBgn0029504 | nonsynonymous |
| 101                               | X   | 7583167  | 7583170  | -      | 10 | 3               | 4               | 859          | 862        | FBgn0029504 | nonsynonymous |
| 102                               | X   | 8423504  | 8423507  | -      | 12 | 4               | 2               | 52           | 55         | FBgn0024943 | nonsynonymous |
| 103                               | X   | 9222309  | 9222315  | -      | 14 | 2               | 2               | 1782         | 1788       | FBgn0085478 | nonsynonymous |
| 104                               | X   | 9222309  | 9222315  | -      | 14 | 2               | 2               | 1713         | 1719       | FBgn0085478 | nonsynonymous |
| 105                               | X   | 10469937 | 10469940 | -      | 14 | 0               | 0               | 280          | 283        | FBgn0085443 | nonsynonymous |
| 106                               | X   | 11911522 | 11911525 | -      | 13 | 26              | 25              | 382          | 385        | FBgn0043001 | nonsynonymous |
| <b>Control specific deletions</b> |     |          |          |        |    |                 |                 |              |            |             |               |
| 1                                 | 2L  | 1607052  | 1607058  | +      | 4  | 12              | 13              | 3386         | 3392       | FBgn0261509 | nonsynonymous |
| 2                                 | 2L  | 4885434  | 4885452  | +      | 17 | 71              | 74              | 1737         | 1755       | FBgn0031643 | nonsynonymous |
| 3                                 | 2L  | 5066964  | 5066973  | +      | 4  | 33              | 34              | 563          | 572        | FBgn0028572 | nonsynonymous |
| 4                                 | 2L  | 5066964  | 5066973  | +      | 4  | 33              | 34              | 563          | 572        | FBgn0028572 | nonsynonymous |
| 5                                 | 2L  | 5066964  | 5066973  | +      | 4  | 33              | 34              | 563          | 572        | FBgn0028572 | nonsynonymous |
| 6                                 | 2L  | 5066964  | 5066973  | +      | 4  | 33              | 34              | 98           | 107        | FBgn0028572 | nonsynonymous |
| 7                                 | 2L  | 5066964  | 5066973  | +      | 4  | 33              | 34              | 98           | 107        | FBgn0028572 | nonsynonymous |
| 8                                 | 2L  | 5066964  | 5066973  | +      | 4  | 33              | 34              | 98           | 107        | FBgn0028572 | nonsynonymous |
| 9                                 | 2L  | 5066964  | 5066973  | +      | 4  | 33              | 34              | 98           | 107        | FBgn0028572 | nonsynonymous |
| 10                                | 2L  | 5066964  | 5066973  | +      | 4  | 33              | 34              | 194          | 203        | FBgn0028572 | nonsynonymous |
| 11                                | 2L  | 5209088  | 5209094  | +      | 7  | 120             | 124             | 1375         | 1381       | FBgn0031688 | nonsynonymous |
| 12                                | 2L  | 12129280 | 12129286 | +      | 12 | 19              | 17              | 3716         | 3722       | FBgn0032414 | nonsynonymous |
| 13                                | 2L  | 16243395 | 16243422 | +      | 6  | 101             | 96              | 4630         | 4657       | FBgn0028859 | nonsynonymous |
| 14                                | 2L  | 16559248 | 16559254 | +      | 10 | 2               | 3               | 1120         | 1126       | FBgn0259735 | nonsynonymous |
| 15                                | 2L  | 16559248 | 16559254 | +      | 10 | 2               | 3               | 1120         | 1126       | FBgn0259735 | nonsynonymous |
| 16                                | 2L  | 16813791 | 16813797 | +      | 13 | 3               | 3               | 527          | 533        | FBgn0086673 | nonsynonymous |
| 17                                | 2L  | 17177434 | 17177435 | +      | 7  | 69              | 69              | 746          | 747        | FBgn0045487 | frameshift    |
| 18                                | 2L  | 18391190 | 18391193 | +      | 5  | 38              | 40              | 1308         | 1311       | FBgn0000636 | nonsynonymous |
| 19                                | 2L  | 19544646 | 19544670 | +      | 18 | 45              | 41              | 1199         | 1223       | FBgn0003231 | nonsynonymous |
| 20                                | 2L  | 19544646 | 19544670 | +      | 18 | 45              | 41              | 1199         | 1223       | FBgn0003231 | nonsynonymous |

Continued on next page

| no. | chr   | start    | end      | strand | w  | conc.<br>cov. 1 | conc.<br>cov. 2 | CDS<br>start | CDS<br>end | Gene ID     | Consequence   |
|-----|-------|----------|----------|--------|----|-----------------|-----------------|--------------|------------|-------------|---------------|
| 21  | 2L    | 3579416  | 3579419  | -      | 5  | 9               | 9               | 761          | 764        | FBgn0004892 | nonsynonymous |
| 22  | 2L    | 4733376  | 4733379  | -      | 4  | 59              | 59              | 997          | 1000       | FBgn0031626 | nonsynonymous |
| 23  | 2L    | 5321064  | 5321073  | -      | 31 | 16              | 13              | 3676         | 3685       | FBgn0031698 | nonsynonymous |
| 24  | 2L    | 5321064  | 5321073  | -      | 31 | 16              | 13              | 3685         | 3694       | FBgn0031698 | nonsense      |
| 25  | 2L    | 6463609  | 6463648  | -      | 4  | 2               | 8               | 196          | 235        | FBgn0031816 | nonsynonymous |
| 26  | 2L    | 6530256  | 6530259  | -      | 8  | 36              | 38              | 190          | 193        | FBgn0000320 | nonsynonymous |
| 27  | 2L    | 6530256  | 6530259  | -      | 8  | 36              | 38              | 172          | 175        | FBgn0000320 | nonsynonymous |
| 28  | 2L    | 7132794  | 7132806  | -      | 13 | 34              | 35              | 590          | 602        | FBgn0085407 | nonsynonymous |
| 29  | 2L    | 7132794  | 7132806  | -      | 13 | 34              | 35              | 590          | 602        | FBgn0085407 | nonsynonymous |
| 30  | 2L    | 8447498  | 8447501  | -      | 5  | 60              | 61              | 1689         | 1692       | FBgn0027780 | nonsynonymous |
| 31  | 2L    | 8961234  | 8961240  | -      | 4  | 78              | 69              | 1115         | 1121       | FBgn0032080 | nonsynonymous |
| 32  | 2L    | 10000272 | 10000284 | -      | 4  | 99              | 99              | 1184         | 1196       | FBgn0051755 | nonsynonymous |
| 33  | 2LHet | 168071   | 168083   | -      | 8  | 101             | 99              | 592          | 604        | FBgn0058042 | nonsynonymous |
| 34  | 2LHet | 168071   | 168083   | -      | 8  | 101             | 99              | 352          | 364        | FBgn0058042 | nonsynonymous |
| 35  | 2R    | 4586016  | 4586018  | +      | 13 | 57              | 57              | 1366         | 1368       | FBgn0033321 | frameshift    |
| 36  | 2R    | 4686607  | 4686640  | +      | 5  | 6               | 1               | 38           | 71         | FBgn0024189 | nonsynonymous |
| 37  | 2R    | 4686607  | 4686640  | +      | 5  | 6               | 1               | 38           | 71         | FBgn0024189 | nonsynonymous |
| 38  | 2R    | 8891058  | 8891061  | +      | 10 | 18              | 19              | 3284         | 3287       | FBgn0008654 | nonsynonymous |
| 39  | 2R    | 8891058  | 8891061  | +      | 10 | 18              | 19              | 3284         | 3287       | FBgn0008654 | nonsynonymous |
| 40  | 2R    | 9734854  | 9734863  | +      | 12 | 20              | 22              | 497          | 506        | FBgn0050484 | nonsense      |
| 41  | 2R    | 9927935  | 9927941  | +      | 5  | 11              | 12              | 2417         | 2423       | FBgn0002643 | nonsynonymous |
| 42  | 2R    | 9927935  | 9927941  | +      | 5  | 11              | 12              | 2417         | 2423       | FBgn0002643 | nonsynonymous |
| 43  | 2R    | 10397874 | 10397877 | +      | 10 | 30              | 32              | 4569         | 4572       | FBgn0000142 | nonsynonymous |
| 44  | 2R    | 10397874 | 10397877 | +      | 10 | 30              | 32              | 4569         | 4572       | FBgn0000142 | nonsynonymous |
| 45  | 2R    | 12051906 | 12051909 | +      | 5  | 1               | 2               | 175          | 178        | FBgn0034083 | nonsynonymous |
| 46  | 2R    | 14017091 | 14017097 | +      | 4  | 28              | 28              | 628          | 634        | FBgn0040465 | nonsynonymous |
| 47  | 2R    | 19539490 | 19539493 | +      | 13 | 1               | 1               | 1556         | 1559       | FBgn0004795 | nonsynonymous |
| 48  | 2R    | 19539490 | 19539493 | +      | 13 | 1               | 1               | 1571         | 1574       | FBgn0004795 | nonsynonymous |
| 49  | 2R    | 20408468 | 20408497 | +      | 4  | 47              | 44              | 1523         | 1552       | FBgn0259187 | frameshift    |
| 50  | 2R    | 7157457  | 7157466  | -      | 10 | 13              | 11              | 325          | 334        | FBgn0033603 | nonsynonymous |
| 51  | 2R    | 7157457  | 7157466  | -      | 10 | 13              | 11              | 325          | 334        | FBgn0033603 | nonsynonymous |
| 52  | 2R    | 8309740  | 8309746  | -      | 6  | 79              | 80              | 188          | 194        | FBgn0033733 | nonsynonymous |
| 53  | 2R    | 8309740  | 8309746  | -      | 6  | 79              | 80              | 188          | 194        | FBgn0033733 | nonsynonymous |
| 54  | 2R    | 8819857  | 8819860  | -      | 7  | 12              | 12              | 1234         | 1237       | FBgn0033783 | nonsynonymous |
| 55  | 2R    | 9950277  | 9950292  | -      | 13 | 17              | 16              | 5155         | 5170       | FBgn0040752 | nonsynonymous |
| 56  | 2R    | 10498192 | 10498201 | -      | 21 | 63              | 63              | 6559         | 6568       | FBgn0026427 | nonsynonymous |
| 57  | 2R    | 10498192 | 10498201 | -      | 21 | 63              | 63              | 1687         | 1696       | FBgn0026427 | nonsynonymous |
| 58  | 2R    | 11653223 | 11653226 | -      | 4  | 4               | 4               | 5485         | 5488       | FBgn0083919 | nonsynonymous |
| 59  | 2R    | 13053562 | 13053604 | -      | 4  | 0               | 3               | 286          | 328        | FBgn0034204 | nonsynonymous |
| 60  | 2R    | 17979419 | 17979449 | -      | 5  | 28              | 33              | 2862         | 2892       | FBgn0034693 | nonsynonymous |
| 61  | 2R    | 17979419 | 17979449 | -      | 5  | 28              | 33              | 1056         | 1086       | FBgn0034693 | nonsynonymous |
| 62  | 2R    | 18012854 | 18012866 | -      | 8  | 46              | 48              | 1667         | 1679       | FBgn0034697 | nonsynonymous |
| 63  | 2R    | 18012854 | 18012866 | -      | 8  | 46              | 48              | 1787         | 1799       | FBgn0034697 | nonsynonymous |
| 64  | 2R    | 18110325 | 18110326 | -      | 9  | 78              | 78              | 656          | 657        | FBgn0034715 | frameshift    |
| 65  | 2R    | 19170797 | 19170800 | -      | 9  | 11              | 11              | 634          | 637        | FBgn0034840 | nonsynonymous |
| 66  | 2R    | 19625357 | 19625360 | -      | 51 | 4               | 4               | 1000         | 1003       | FBgn0000562 | nonsynonymous |
| 67  | 2R    | 19900210 | 19900211 | -      | 4  | 43              | 43              | 55           | 56         | FBgn0053519 | frameshift    |
| 68  | 2R    | 20136710 | 20136713 | -      | 4  | 30              | 28              | 2016         | 2019       | FBgn0034994 | nonsynonymous |
| 69  | 2R    | 20313352 | 20313355 | -      | 12 | 0               | 0               | 142          | 145        | FBgn0259210 | nonsynonymous |
| 70  | 2R    | 20313352 | 20313355 | -      | 12 | 0               | 0               | 142          | 145        | FBgn0259210 | nonsynonymous |
| 71  | 2R    | 20313352 | 20313355 | -      | 12 | 0               | 0               | 142          | 145        | FBgn0259210 | nonsynonymous |
| 72  | 2R    | 20834457 | 20834460 | -      | 5  | 73              | 75              | 1356         | 1359       | FBgn0027599 | nonsynonymous |
| 73  | 2RHet | 471528   | 471531   | -      | 5  | 101             | 100             | 188          | 191        | FBgn0043842 | nonsynonymous |
| 74  | 3L    | 1229685  | 1229688  | +      | 7  | 27              | 27              | 83           | 86         | FBgn0260963 | nonsense      |
| 75  | 3L    | 1314504  | 1314513  | +      | 5  | 22              | 25              | 276          | 285        | FBgn0035207 | nonsynonymous |
| 76  | 3L    | 1314504  | 1314513  | +      | 5  | 22              | 25              | 276          | 285        | FBgn0035207 | nonsynonymous |
| 77  | 3L    | 5476159  | 5476168  | +      | 8  | 38              | 38              | 3062         | 3071       | FBgn0035607 | nonsynonymous |
| 78  | 3L    | 7238085  | 7238124  | +      | 10 | 54              | 57              | 598          | 637        | FBgn0016036 | nonsynonymous |
| 79  | 3L    | 9079370  | 9079400  | +      | 15 | 66              | 74              | 3156         | 3186       | FBgn0023479 | nonsynonymous |
| 80  | 3L    | 9079370  | 9079400  | +      | 15 | 66              | 74              | 846          | 876        | FBgn0023479 | nonsynonymous |
| 81  | 3L    | 9079390  | 9079420  | +      | 12 | 71              | 78              | 3176         | 3206       | FBgn0023479 | nonsynonymous |
| 82  | 3L    | 9079390  | 9079420  | +      | 12 | 71              | 78              | 866          | 896        | FBgn0023479 | nonsynonymous |
| 83  | 3L    | 9439363  | 9439375  | +      | 5  | 27              | 27              | 596          | 608        | FBgn0053926 | nonsynonymous |
| 84  | 3L    | 9586020  | 9586026  | +      | 5  | 23              | 24              | 1238         | 1244       | FBgn0261555 | nonsynonymous |
| 85  | 3L    | 9586020  | 9586026  | +      | 5  | 23              | 24              | 1856         | 1862       | FBgn0261555 | nonsynonymous |
| 86  | 3L    | 11210058 | 11210067 | +      | 4  | 29              | 26              | 130          | 139        | FBgn0261553 | nonsynonymous |
| 87  | 3L    | 11210058 | 11210067 | +      | 4  | 29              | 26              | 130          | 139        | FBgn0261553 | nonsynonymous |
| 88  | 3L    | 11210058 | 11210067 | +      | 4  | 29              | 26              | 130          | 139        | FBgn0261553 | nonsynonymous |
| 89  | 3L    | 11210058 | 11210067 | +      | 4  | 29              | 26              | 130          | 139        | FBgn0261553 | nonsynonymous |
| 90  | 3L    | 11210058 | 11210067 | +      | 4  | 29              | 26              | 130          | 139        | FBgn0261553 | nonsynonymous |
| 91  | 3L    | 12879687 | 12879720 | +      | 5  | 1               | 1               | 1536         | 1569       | FBgn0036321 | nonsynonymous |
| 92  | 3L    | 1348857  | 1348886  | +      | 4  | 5               | 5               | 131          | 140        | FBgn0036373 | nonsynonymous |
| 93  | 3L    | 13844314 | 13844315 | +      | 13 | 38              | 38              | 3601         | 3602       | FBgn0029167 | frameshift    |
| 94  | 3L    | 14001788 | 14001797 | +      | 4  | 52              | 50              | 839          | 848        | FBgn0036398 | nonsynonymous |
| 95  | 3L    | 14227073 | 14227163 | +      | 11 | 43              | 29              | 425          | 515        | FBgn0036416 | nonsynonymous |
| 96  | 3L    | 14658844 | 14658845 | +      | 23 | 2               | 2               | 794          | 795        | FBgn0041604 | frameshift    |
| 97  | 3L    | 16709753 | 16709756 | +      | 4  | 72              | 76              | 1200         | 1203       | FBgn0000414 | nonsynonymous |
| 98  | 3L    | 16709753 | 16709756 | +      | 4  | 72              | 76              | 1200         | 1203       | FBgn0000414 | nonsynonymous |
| 99  | 3L    | 22687535 | 22687553 | +      | 4  | 9               | 9               | 334          | 352        | FBgn0037179 | nonsynonymous |
| 100 | 3L    | 23709609 | 23709610 | +      | 4  | 60              | 60              | 598          | 599        | FBgn0039977 | frameshift    |
| 101 | 3L    | 1435919  | 1435921  | -      | 7  | 41              | 41              | 1544         | 1546       | FBgn0043865 | frameshift    |

Continued on next page

| no. | chr | start    | end      | strand | w  | conc.<br>cov. 1 | conc.<br>cov. 2 | CDS<br>start | CDS<br>end | Gene ID     | Consequence   |
|-----|-----|----------|----------|--------|----|-----------------|-----------------|--------------|------------|-------------|---------------|
| 102 | 3L  | 1435919  | 1435921  | -      | 7  | 41              | 41              | 1544         | 1546       | FBgn0043865 | frameshift    |
| 103 | 3L  | 6725421  | 6725427  | -      | 8  | 52              | 53              | 5542         | 5548       | FBgn0052394 | nonsynonymous |
| 104 | 3L  | 6744039  | 6744045  | -      | 4  | 31              | 31              | 433          | 439        | FBgn0035713 | nonsynonymous |
| 105 | 3L  | 6744039  | 6744045  | -      | 4  | 31              | 31              | 433          | 439        | FBgn0035713 | nonsynonymous |
| 106 | 3L  | 7230592  | 7230599  | -      | 8  | 26              | 28              | 535          | 542        | FBgn0035751 | frameshift    |
| 107 | 3L  | 7824217  | 7824223  | -      | 4  | 5               | 5               | 456          | 462        | FBgn0016694 | nonsynonymous |
| 108 | 3L  | 7824217  | 7824223  | -      | 4  | 5               | 5               | 456          | 462        | FBgn0016694 | nonsynonymous |
| 109 | 3L  | 8985631  | 8985640  | -      | 15 | 38              | 38              | 2871         | 2880       | FBgn0016070 | nonsynonymous |
| 110 | 3L  | 8985631  | 8985640  | -      | 15 | 38              | 38              | 2871         | 2880       | FBgn0016070 | nonsynonymous |
| 111 | 3L  | 8985631  | 8985640  | -      | 15 | 38              | 38              | 2871         | 2880       | FBgn0016070 | nonsynonymous |
| 112 | 3L  | 8985631  | 8985640  | -      | 15 | 38              | 38              | 2871         | 2880       | FBgn0016070 | nonsynonymous |
| 113 | 3L  | 8985631  | 8985640  | -      | 15 | 38              | 38              | 2871         | 2880       | FBgn0016070 | nonsynonymous |
| 114 | 3L  | 9409723  | 9409726  | -      | 4  | 2               | 2               | 448          | 451        | FBgn0035988 | nonsynonymous |
| 115 | 3L  | 10216992 | 10217004 | -      | 5  | 30              | 33              | 505          | 517        | FBgn0052056 | nonsynonymous |
| 116 | 3L  | 12768985 | 12769003 | -      | 13 | 111             | 117             | 1352         | 1370       | FBgn0052106 | nonsynonymous |
| 117 | 3L  | 13511529 | 13511532 | -      | 13 | 14              | 14              | 227          | 230        | FBgn0036377 | nonsynonymous |
| 118 | 3L  | 13907404 | 13907407 | -      | 10 | 23              | 23              | 222          | 225        | FBgn0026376 | nonsynonymous |
| 119 | 3L  | 14018835 | 14018838 | -      | 10 | 0               | 0               | 2671         | 2674       | FBgn0052133 | nonsynonymous |
| 120 | 3L  | 16918205 | 16918223 | -      | 4  | 14              | 12              | 862          | 880        | FBgn0036677 | nonsynonymous |
| 121 | 3L  | 18663249 | 18663255 | -      | 6  | 5               | 4               | 1765         | 1771       | FBgn0042134 | nonsynonymous |
| 122 | 3R  | 3021473  | 3021482  | +      | 23 | 28              | 29              | 1850         | 1859       | FBgn0086372 | nonsynonymous |
| 123 | 3R  | 3021473  | 3021482  | +      | 23 | 28              | 29              | 1850         | 1859       | FBgn0086372 | nonsynonymous |
| 124 | 3R  | 9907419  | 9907425  | +      | 9  | 33              | 33              | 1641         | 1647       | FBgn0038197 | nonsynonymous |
| 125 | 3R  | 9907419  | 9907425  | +      | 9  | 33              | 33              | 1641         | 1647       | FBgn0038197 | nonsynonymous |
| 126 | 3R  | 9907419  | 9907425  | +      | 9  | 33              | 33              | 2196         | 2202       | FBgn0038197 | nonsynonymous |
| 127 | 3R  | 10342878 | 10342890 | +      | 9  | 73              | 63              | 104          | 116        | FBgn0085302 | nonsynonymous |
| 128 | 3R  | 16114233 | 16114236 | +      | 8  | 9               | 11              | 290          | 293        | FBgn0038780 | nonsynonymous |
| 129 | 3R  | 21168109 | 21168139 | +      | 29 | 91              | 99              | 1733         | 1763       | FBgn0027376 | nonsynonymous |
| 130 | 3R  | 23196662 | 23196665 | +      | 10 | 35              | 35              | 4628         | 4631       | FBgn0260487 | nonsynonymous |
| 131 | 3R  | 24526620 | 24526635 | +      | 6  | 35              | 35              | 1243         | 1258       | FBgn0027655 | nonsynonymous |
| 132 | 3R  | 24527322 | 24527331 | +      | 23 | 8               | 8               | 1511         | 1520       | FBgn0027655 | nonsynonymous |
| 133 | 3R  | 24735787 | 24735790 | +      | 26 | 3               | 3               | 3886         | 3889       | FBgn0259220 | nonsynonymous |
| 134 | 3R  | 24735787 | 24735790 | +      | 26 | 3               | 3               | 247          | 250        | FBgn0259220 | nonsynonymous |
| 135 | 3R  | 2217261  | 2217276  | -      | 5  | 1               | 0               | 454          | 469        | FBgn0037443 | nonsynonymous |
| 136 | 3R  | 2217261  | 2217276  | -      | 5  | 1               | 0               | 454          | 469        | FBgn0037443 | nonsynonymous |
| 137 | 3R  | 2217261  | 2217276  | -      | 5  | 1               | 0               | 454          | 469        | FBgn0037443 | nonsynonymous |
| 138 | 3R  | 2217261  | 2217276  | -      | 5  | 1               | 0               | 40           | 55         | FBgn0037443 | nonsynonymous |
| 139 | 3R  | 2217261  | 2217276  | -      | 5  | 1               | 0               | 577          | 592        | FBgn0037443 | nonsynonymous |
| 140 | 3R  | 4609852  | 4609858  | -      | 11 | 83              | 86              | 832          | 838        | FBgn0261015 | nonsynonymous |
| 141 | 3R  | 4609852  | 4609858  | -      | 11 | 83              | 86              | 832          | 838        | FBgn0261015 | nonsynonymous |
| 142 | 3R  | 4609852  | 4609858  | -      | 11 | 83              | 86              | 1873         | 1879       | FBgn0261015 | nonsynonymous |
| 143 | 3R  | 6598791  | 6598794  | -      | 18 | 104             | 103             | 165          | 168        | FBgn0020439 | nonsynonymous |
| 144 | 3R  | 6600757  | 6600763  | -      | 6  | 23              | 23              | 100          | 106        | FBgn0020439 | nonsynonymous |
| 145 | 3R  | 8227435  | 8227441  | -      | 10 | 55              | 55              | 27           | 33         | FBgn0038035 | nonsynonymous |
| 146 | 3R  | 10039846 | 10039861 | -      | 4  | 14              | 14              | 139          | 154        | FBgn0011582 | nonsynonymous |
| 147 | 3R  | 10039846 | 10039861 | -      | 4  | 14              | 14              | 139          | 154        | FBgn0011582 | nonsynonymous |
| 148 | 3R  | 10147775 | 10147778 | -      | 6  | 58              | 58              | 2838         | 2841       | FBgn0038223 | nonsynonymous |
| 149 | 3R  | 10580166 | 10580169 | -      | 7  | 58              | 57              | 320          | 323        | FBgn0038258 | nonsynonymous |
| 150 | 3R  | 11248525 | 11248531 | -      | 6  | 49              | 51              | 1998         | 2004       | FBgn0038339 | nonsynonymous |
| 151 | 3R  | 11248525 | 11248531 | -      | 6  | 49              | 51              | 2250         | 2256       | FBgn0038339 | nonsynonymous |
| 152 | 3R  | 13058895 | 13058912 | -      | 4  | 63              | 52              | 1111         | 1128       | FBgn0038494 | frameshift    |
| 153 | 3R  | 13609108 | 13609120 | -      | 4  | 19              | 19              | 529          | 541        | FBgn0038544 | nonsynonymous |
| 154 | 3R  | 13609330 | 13609333 | -      | 5  | 34              | 33              | 316          | 319        | FBgn0038544 | nonsynonymous |
| 155 | 3R  | 13609345 | 13609348 | -      | 8  | 32              | 34              | 301          | 304        | FBgn0038544 | nonsynonymous |
| 156 | 3R  | 15196876 | 15196879 | -      | 4  | 3               | 3               | 4514         | 4517       | FBgn0086613 | nonsynonymous |
| 157 | 3R  | 25414838 | 25414841 | -      | 21 | 78              | 79              | 644          | 647        | FBgn0039671 | nonsynonymous |
| 158 | X   | 5732240  | 5732252  | +      | 30 | 1               | 5               | 1629         | 1641       | FBgn0029814 | nonsynonymous |
| 159 | X   | 6552220  | 6552232  | +      | 4  | 1               | 0               | 1135         | 1147       | FBgn0028360 | nonsynonymous |
| 160 | X   | 8406521  | 8406536  | +      | 5  | 0               | 0               | 650          | 665        | FBgn0053181 | nonsynonymous |
| 161 | X   | 8406521  | 8406536  | +      | 5  | 0               | 0               | 650          | 665        | FBgn0053181 | nonsynonymous |
| 162 | X   | 8406521  | 8406536  | +      | 5  | 0               | 0               | 140          | 155        | FBgn0053181 | nonsynonymous |
| 163 | X   | 8406521  | 8406536  | +      | 5  | 0               | 0               | 650          | 665        | FBgn0053181 | nonsynonymous |
| 164 | X   | 8406521  | 8406536  | +      | 5  | 0               | 0               | 599          | 614        | FBgn0053181 | nonsynonymous |
| 165 | X   | 9927751  | 9927754  | +      | 4  | 3               | 6               | 3001         | 3004       | FBgn0030171 | nonsynonymous |
| 166 | X   | 13484375 | 13484378 | +      | 42 | 0               | 0               | 1468         | 1471       | FBgn0086674 | nonsynonymous |
| 167 | X   | 18744396 | 18744408 | +      | 12 | 0               | 3               | 1817         | 1829       | FBgn0085451 | nonsynonymous |
| 168 | X   | 20965495 | 20965498 | +      | 15 | 1               | 1               | 484          | 487        | FBgn0064123 | nonsynonymous |
| 169 | X   | 1651253  | 1651260  | -      | 4  | 20              | 25              | 64           | 71         | FBgn0040898 | frameshift    |
| 170 | X   | 5555088  | 5555094  | -      | 17 | 2               | 0               | 992          | 998        | FBgn0259150 | nonsynonymous |
| 171 | X   | 5555088  | 5555094  | -      | 17 | 2               | 0               | 992          | 998        | FBgn0259150 | nonsynonymous |
| 172 | X   | 19438581 | 19438590 | -      | 4  | 1               | 1               | 550          | 559        | FBgn0052532 | nonsynonymous |
| 173 | X   | 20024919 | 20024926 | -      | 4  | 21              | 22              | 233          | 240        | FBgn0260872 | frameshift    |

End of the table
