# Supplementary material for: A Deterministic Analysis of Genome Integrity during Neoplastic Growth in Drosophila
Source: PubMed Central journal article supplement (PMC3916295; doi:10.1371/journal.pone.0087090), 2014-02-06
Supplement: pone.0087090.s014.pdf [file pone.0087090.s014.pdf]

Supporting Information for:  
“A deterministic analysis of genome integrity during neoplastic  
growth in *Drosophila*”  
Table S3

Cem Sievers<sup>1</sup>, Federico Comoglio<sup>1</sup>, Makiko Seimiya<sup>1</sup>, Gunter Merdes<sup>1,\*</sup> and Renato Paro<sup>1,2,\*</sup>

<sup>1</sup>Department of Biosystems Science and Engineering, Swiss Federal Institute of Technology Zurich,  
Mattenstrasse 26, 4058 Basel, Switzerland

<sup>2</sup>Faculty of Science, University of Basel, Klingelbergstrasse 50, 4056 Basel, Switzerland

July 12, 2013

| ID | Coordinates | Genotype | SV type   | Length | size on ref. (r) | corrected size (t) | FWD primer                | REV primer                  |
|----|-------------|----------|-----------|--------|------------------|--------------------|---------------------------|-----------------------------|
| 1  | 2L:18578669 | Hom      | small ins | 120    | 196              | 316                | CCTGGATACCTCTGGCAAAC      | AGGAGCCAGTTGAAATTGA         |
| 2  | 2L:21017450 | Hom      | small ins | 133    | 183              | 316                | TGGGATTAATTTCGCTTTATGA    | CAGATGCTGATAAGGGAAAGATG     |
| 3  | 3R:1975276  | Hom      | small ins | 100    | 127              | 227                | TTTTCTCAGTGCATACTCAGCAG   | CTGCCAACTAAAGCAAAGG         |
| 4  | 2L:2646518  | Hom      | small ins | 102    | 149              | 251                | GGATGCTGTCATTTGCTACG      | CACAAACTGCCAGCTACCAA        |
| 5  | 2R:4530459  | Het      | small ins | 114    | 140              | 254                | TTCAATCTCCTGTGTGCTGAA     | CCCAGAAAAATAGGCACCTTC       |
| 6  | 3R:21701316 | Het      | small ins | 114    | 164              | 278                | AATTATGATTCGGGCCACACC     | CCATTGAACAACGCCAATTA        |
| 7  | 2L:3289401  | Hom      | small ins | 25     | 146              | 171                | TTTTCAAAGCAAAAAGCAGTCC    | ATCGGCTGTAGGTCCTTGAA        |
| 8  | 2R:3872130  | Hom      | small ins | 22     | 124              | 146                | GATTTGGAGGAAATGCTGAA      | TGATTATGATAGGCTAAGCAAAGC    |
| 9  | 3L:17484346 | Hom      | small ins | 28     | 188              | 216                | AGTCGCCACTATCAGCCAGA      | TGCACAAATATGCTTCCGTTA       |
| 10 | 3R:1771634  | Het      | small ins | 31     | 181              | 212                | ACTTTTTCCACTGGGTCCAT      | GAAGGCATAAAATAGAAAGCAAA     |
| 11 | 3R:8492543  | Hom      | del       | 74     | 251              | 177                | CGATCAAAGCCATCAAAAT       | TGCTTTGTAGATAGTGTCAPTAAAGG  |
| 12 | 3L:10182662 | Hom      | del       | 132    | 298              | 166                | ATGAAAATGCAAGCGACCT       | TGCTTAAAGCCCTTTTTCGTT       |
| 13 | 3L:22637989 | Het      | del       | 175    | 317              | 142                | GCCAAAATGGAGTCCGAGT       | TCGTTTGTGAATTTATGGGTGA      |
| 14 | 3R:26987829 | Het      | del       | 245    | 368              | 123                | AATTTGGCTGCCAATGAAAG      | TGGCAAATGTTTGAGTTTGG        |
| 15 | 3R:22289554 | Het      | del       | 120    | 316              | 196                | GCCTTCCACAGTTCATTGCT      | GGCTGTTTCGTAATGATCCA        |
| 16 | 2L:12736726 | Hom      | del       | 23     | 200              | 177                | CTGATCGGTACCCGGAAAAT      | TTCGTTAGTCACACAGCGAAAG      |
| 17 | 2L:5757822  | Hom      | del       | 22     | 200              | 178                | GGTAATFTAGTTTCAACCCAGTGC  | TTTGGCATTTAAAACAGAAGC       |
| 18 | 3R:3765275  | Het      | del       | 22     | 146              | 124                | TTCTTGTTCGCAAAATAACCA     | TCCTGAATTTGTACAPATATTTAATCG |
| 19 | 2R:8489223  | Het      | del       | 25     | 202              | 177                | TGCTGGGTATGAAAACAAGG      | AAAATGCATATTTTCGGTCTG       |
| 20 | 2R:10867320 | Het      | del       | 23     | 206              | 183                | AGCTGAATTTAGAAAGTTGTGGTG  | ACAAAAGTACATAGTGTTCCTCA     |
| 21 | 3L:15041213 | n.d.     | tan dup   | 418    | 495              | 913                | TTTCCCATAAAGTATGTCATAAATA | TGACATAGTCCCAATGGTTTCA      |
| 22 | 3R:20192157 | n.d.     | tan dup   | 565    | 648              | 1213               | CTGGCACACAGTTGCAGTTT      | GATTTGGGGTCTCCAGATGAA       |
| 23 | 2R:5543741  | n.d.     | tan dup   | 889    | 985              | 1874               | GCCAGGATGGGAATTTTCTT      | TGGCACTAAAATGCCAAATGG       |
| 24 | 2L:3026214  | n.d.     | tan dup   | 710    | 773              | 1483               | TAAGGAGGATCGGGAGAGGT      | CAAGTCTGCTGAGAAAGC          |
| 25 | 3L:15825407 | Het      | del       | 28     | 205              | 177                | CGAACCCGATTTGTTTTGTT      | GCCTGAAAGTTTCTCCACGTC       |
| 26 | 3L:15828140 | Het      | del       | 102    | 215              | 113                | CTTTCTCCACACAGCTGAA       | TAGGTAAGCAGCGGTGGATT        |
| 27 | 3L:15826899 | n.d.     | tan dup   | 293    | 442              | 735                | TGGGATGTTGCCAAATGTTA      | CTAAGGGCCCAAGCTGAATTT       |
