# Supplementary material for: A Deterministic Analysis of Genome Integrity during Neoplastic Growth in Drosophila
Source: PubMed Central journal article supplement (PMC3916295; doi:10.1371/journal.pone.0087090), 2014-02-06
Supplement: pone.0087090.s015.pdf [file pone.0087090.s015.pdf]

Supplementary material for:  
 “A deterministic analysis of genome integrity during neoplastic  
 growth in *Drosophila*”

Table S4

Cem Sievers<sup>1</sup>, Federico Comoglio<sup>1</sup>, Makiko Seimiya<sup>1</sup>, Gunter Merdes<sup>1,\*</sup> and Renato Paro<sup>1,2,\*</sup>

<sup>1</sup>Department of Biosystems Science and Engineering, Swiss Federal Institute of Technology Zurich,  
 Mattenstrasse 26, 4058 Basel, Switzerland

<sup>2</sup>Faculty of Science, University of Basel, Klingelbergstrasse 50, 4056 Basel, Switzerland

December 14, 2013

|                                            | DSVD          |               |                | Delly-PE      |               |                | BD             | Pindel         | CLEVER         |
|--------------------------------------------|---------------|---------------|----------------|---------------|---------------|----------------|----------------|----------------|----------------|
|                                            | <i>c</i> = 1x | <i>c</i> = 5x | <i>c</i> = 20x | <i>c</i> = 1x | <i>c</i> = 5x | <i>c</i> = 20x | <i>c</i> = 20x | <i>c</i> = 20x | <i>c</i> = 20x |
| <b>Single and double breakpoint events</b> |               |               |                |               |               |                |                |                |                |
| Small insertions                           |               |               |                |               |               |                |                |                |                |
| <i>n</i>                                   | 228           | 704           | 971            | -             | -             | -              | 288            | -              | -              |
| ±0                                         | 170           | 491           | 674            | -             | -             | -              | -              | -              | -              |
| ±1                                         | 223           | 673           | 915            | -             | -             | -              | -              | -              | -              |
| ±2                                         | 226           | 692           | 943            | -             | -             | -              | -              | -              | -              |
| ±5                                         | 226           | 694           | 948            | -             | -             | -              | -              | -              | -              |
| Small deletions                            |               |               |                |               |               |                |                |                |                |
| <i>n</i>                                   | 215           | 745           | 997            | -             | -             | -              | 368            | 154            | -              |
| ±0                                         | 158           | 514           | 675            | -             | -             | -              | -              | -              | -              |
| ±1                                         | 206           | 714           | 925            | -             | -             | -              | -              | -              | -              |
| ±2                                         | 211           | 733           | 955            | -             | -             | -              | -              | -              | -              |
| ±5                                         | 211           | 733           | 958            | -             | -             | -              | -              | -              | -              |
| Large deletions                            |               |               |                |               |               |                |                |                |                |
| <i>n</i>                                   | 250           | 718           | 980            | 185           | 858           | 966            | 950            | 963            | 960            |
| ±0                                         | 180           | 539           | 696            | 182           | 778           | 668            | -              | -              | -              |
| ±1                                         | 239           | 692           | 920            | 184           | 791           | 715            | -              | -              | -              |
| ±2                                         | 243           | 707           | 939            | 184           | 805           | 784            | -              | -              | -              |
| ±5                                         | 244           | 710           | 944            | 185           | 847           | 940            | -              | -              | -              |
| Inversions                                 |               |               |                |               |               |                |                |                |                |
| <i>n</i>                                   | 394           | 889           | 953            | 27            | 731           | 957            | 954            | 977            | -              |
| ±0                                         | 288           | 664           | 686            | 27            | 731           | 957            | -              | -              | -              |
| ±1                                         | 387           | 874           | 936            | 27            | 731           | 957            | -              | -              | -              |
| ±2                                         | 394           | 887           | 949            | 27            | 731           | 957            | -              | -              | -              |
| ±5                                         | 394           | 889           | 953            | 27            | 731           | 957            | -              | -              | -              |
| Tandem Duplications                        |               |               |                |               |               |                |                |                |                |
| <i>n</i>                                   | 229           | 708           | 951            | 196           | 874           | 975            | -              | 965            | -              |
| ±0                                         | 171           | 514           | 683            | 181           | 784           | 656            | -              | -              | -              |

Continued on next page

|                                          | DSVD     |          |           | Delly-PE |          |           | BD        | Pindel    | CLEVER    |
|------------------------------------------|----------|----------|-----------|----------|----------|-----------|-----------|-----------|-----------|
|                                          | $c = 1x$ | $c = 5x$ | $c = 20x$ | $c = 1x$ | $c = 5x$ | $c = 20x$ | $c = 20x$ | $c = 20x$ | $c = 20x$ |
| $\pm 1$                                  | 225      | 695      | 933       | 185      | 802      | 716       | -         | -         | -         |
| $\pm 2$                                  | 228      | 708      | 946       | 187      | 820      | 779       | -         | -         | -         |
| $\pm 5$                                  | 229      | 708      | 951       | 195      | 864      | 941       | -         | -         | -         |
| <b>Insertional duplications</b>          |          |          |           |          |          |           |           |           |           |
| intrachromosomal downstream no inversion |          |          |           |          |          |           |           |           |           |
| $n$                                      | 57       | 500      | 911       | -        | -        | -         | -         | -         | -         |
| $\pm 0$                                  | 52       | 458      | 830       | -        | -        | -         | -         | -         | -         |
| $\pm 1$                                  | 56       | 498      | 900       | -        | -        | -         | -         | -         | -         |
| $\pm 2$                                  | 57       | 500      | 900       | -        | -        | -         | -         | -         | -         |
| $\pm 5$                                  | 57       | 500      | 910       | -        | -        | -         | -         | -         | -         |
| intrachromosomal downstream inversion    |          |          |           |          |          |           |           |           |           |
| $n$                                      | 53       | 519      | 915       | -        | -        | -         | -         | -         | -         |
| $\pm 0$                                  | 49       | 471      | 829       | -        | -        | -         | -         | -         | -         |
| $\pm 1$                                  | 52       | 514      | 896       | -        | -        | -         | -         | -         | -         |
| $\pm 2$                                  | 52       | 515      | 898       | -        | -        | -         | -         | -         | -         |
| $\pm 5$                                  | 53       | 519      | 915       | -        | -        | -         | -         | -         | -         |
| intrachromosomal upstream no inversion   |          |          |           |          |          |           |           |           |           |
| $n$                                      | 53       | 499      | 914       | -        | -        | -         | -         | -         | -         |
| $\pm 0$                                  | 48       | 455      | 837       | -        | -        | -         | -         | -         | -         |
| $\pm 1$                                  | 53       | 497      | 906       | -        | -        | -         | -         | -         | -         |
| $\pm 2$                                  | 53       | 497      | 910       | -        | -        | -         | -         | -         | -         |
| $\pm 5$                                  | 53       | 498      | 913       | -        | -        | -         | -         | -         | -         |
| intrachromosomal upstream inversion      |          |          |           |          |          |           |           |           |           |
| $n$                                      | 50       | 490      | 907       | -        | -        | -         | -         | -         | -         |
| $\pm 0$                                  | 47       | 460      | 838       | -        | -        | -         | -         | -         | -         |
| $\pm 1$                                  | 50       | 489      | 900       | -        | -        | -         | -         | -         | -         |
| $\pm 2$                                  | 50       | 490      | 902       | -        | -        | -         | -         | -         | -         |
| $\pm 5$                                  | 50       | 490      | 907       | -        | -        | -         | -         | -         | -         |
| interchromosomal no inversion            |          |          |           |          |          |           |           |           |           |
| $n$                                      | 45       | 505      | 891       | -        | -        | -         | -         | -         | -         |
| $\pm 0$                                  | 40       | 462      | 803       | -        | -        | -         | -         | -         | -         |
| $\pm 1$                                  | 44       | 504      | 888       | -        | -        | -         | -         | -         | -         |
| $\pm 2$                                  | 44       | 505      | 889       | -        | -        | -         | -         | -         | -         |
| $\pm 5$                                  | 45       | 505      | 891       | -        | -        | -         | -         | -         | -         |
| interchromosomal inversion               |          |          |           |          |          |           |           |           |           |
| $n$                                      | 34       | 489      | 893       | -        | -        | -         | -         | -         | -         |
| $\pm 0$                                  | 29       | 453      | 820       | -        | -        | -         | -         | -         | -         |
| $\pm 1$                                  | 34       | 487      | 887       | -        | -        | -         | -         | -         | -         |
| $\pm 2$                                  | 34       | 487      | 888       | -        | -        | -         | -         | -         | -         |
| $\pm 5$                                  | 34       | 488      | 892       | -        | -        | -         | -         | -         | -         |
| <b>Translocations</b>                    |          |          |           |          |          |           |           |           |           |
| intrachromosomal downstream              |          |          |           |          |          |           |           |           |           |

Continued on next page

|                                        | DSVD     |          |           | Delly-PE |          |           | BD        | Pindel    | CLEVER    |
|----------------------------------------|----------|----------|-----------|----------|----------|-----------|-----------|-----------|-----------|
|                                        | $c = 1x$ | $c = 5x$ | $c = 20x$ | $c = 1x$ | $c = 5x$ | $c = 20x$ | $c = 20x$ | $c = 20x$ | $c = 20x$ |
| no inversion                           |          |          |           |          |          |           |           |           |           |
| $n$                                    | 13       | 374      | 901       | -        | -        | -         | -         | -         | -         |
| $\pm 0$                                | 13       | 339      | 811       | -        | -        | -         | -         | -         | -         |
| $\pm 1$                                | 13       | 374      | 900       | -        | -        | -         | -         | -         | -         |
| $\pm 2$                                | 13       | 374      | 901       | -        | -        | -         | -         | -         | -         |
| $\pm 5$                                | 13       | 374      | 901       | -        | -        | -         | -         | -         | -         |
| intrachromosomal downstream inversion  |          |          |           |          |          |           |           |           |           |
| $n$                                    | 11       | 380      | 855       | -        | -        | -         | -         | -         | -         |
| $\pm 0$                                | 10       | 345      | 794       | -        | -        | -         | -         | -         | -         |
| $\pm 1$                                | 11       | 379      | 873       | -        | -        | -         | -         | -         | -         |
| $\pm 2$                                | 11       | 380      | 878       | -        | -        | -         | -         | -         | -         |
| $\pm 5$                                | 11       | 380      | 884       | -        | -        | -         | -         | -         | -         |
| intrachromosomal upstream no inversion |          |          |           |          |          |           |           |           |           |
| $n$                                    | 11       | 381      | 914       | -        | -        | -         | -         | -         | -         |
| $\pm 0$                                | 10       | 357      | 836       | -        | -        | -         | -         | -         | -         |
| $\pm 1$                                | 11       | 381      | 914       | -        | -        | -         | -         | -         | -         |
| $\pm 2$                                | 11       | 381      | 914       | -        | -        | -         | -         | -         | -         |
| $\pm 5$                                | 11       | 381      | 914       | -        | -        | -         | -         | -         | -         |
| intrachromosomal upstream inversion    |          |          |           |          |          |           |           |           |           |
| $n$                                    | 13       | 385      | 909       | -        | -        | -         | -         | -         | -         |
| $\pm 0$                                | 11       | 362      | 824       | -        | -        | -         | -         | -         | -         |
| $\pm 1$                                | 13       | 385      | 904       | -        | -        | -         | -         | -         | -         |
| $\pm 2$                                | 13       | 385      | 909       | -        | -        | -         | -         | -         | -         |
| $\pm 5$                                | 13       | 385      | 909       | -        | -        | -         | -         | -         | -         |
| interchromosomal no inversion†         |          |          |           |          |          |           |           |           |           |
| $n$                                    | 20(46)   | 387(121) | 901(10)   | 28       | 750      | 979       | 528       | -         | -         |
| $\pm 0$                                | 20       | 361      | 804       | 28       | 750      | 979       | -         | -         | -         |
| $\pm 1$                                | 20       | 387      | 901       | 28       | 750      | 979       | -         | -         | -         |
| $\pm 2$                                | 20       | 387      | 901       | 28       | 750      | 979       | -         | -         | -         |
| $\pm 5$                                | 20       | 387      | 901       | 28       | 750      | 979       | -         | -         | -         |
| interchromosomal inversion†            |          |          |           |          |          |           |           |           |           |
| $n$                                    | 10(41)   | 392(134) | 895(10)   | 22       | 774      | 974       | 144       | -         | -         |
| $\pm 0$                                | 10       | 360      | 779       | 22       | 774      | 974       | -         | -         | -         |
| $\pm 1$                                | 10       | 391      | 885       | 22       | 774      | 974       | -         | -         | -         |
| $\pm 2$                                | 10       | 391      | 888       | 22       | 774      | 974       | -         | -         | -         |
| $\pm 5$                                | 10       | 392      | 895       | 22       | 774      | 974       | -         | -         | -         |
