# Supplementary material for: A Deterministic Analysis of Genome Integrity during Neoplastic Growth in Drosophila
Source: PubMed Central journal article supplement (PMC3916295; doi:10.1371/journal.pone.0087090), 2014-02-06
Supplement: pone.0087090.s016.pdf [file pone.0087090.s016.pdf]

Supporting Information for:  
“A deterministic analysis of genome integrity during neoplastic  
growth in *Drosophila*”  
Table S5

Cem Sievers<sup>1</sup>, Federico Comoglio<sup>1</sup>, Makiko Seimiya<sup>1</sup>, Gunter Merdes<sup>1,\*</sup> and Renato Paro<sup>1,2,\*</sup>

<sup>1</sup>Department of Biosystems Science and Engineering, Swiss Federal Institute of Technology Zurich,  
Mattenstrasse 26, 4058 Basel, Switzerland

<sup>2</sup>Faculty of Science, University of Basel, Klingelbergstrasse 50, 4056 Basel, Switzerland

December 14, 2013

| ID | SV sequence                                                                                                                                                                                                                                                                                                                                                                                                              | Sequencing result                                                                                                                                                                                                                                                                                                                                                                                                    |
|----|--------------------------------------------------------------------------------------------------------------------------------------------------------------------------------------------------------------------------------------------------------------------------------------------------------------------------------------------------------------------------------------------------------------------------|----------------------------------------------------------------------------------------------------------------------------------------------------------------------------------------------------------------------------------------------------------------------------------------------------------------------------------------------------------------------------------------------------------------------|
| 1  | CCTGGATACCTCTGGCAAACAGCTTGGCTATCGCTCA<br>CCCACACACATGACCTTCGGTGGTTGCCACCACCCC<br>CATGGGTTTTTCTCATATGAGCA <b>ACTCACTACCCGG</b><br><b>CAAGAAGGCCATAAAAGCAAATGAAAGCGGATGGAT</b><br><b>ACCGAGTGACCAGCGAATCCCAGCTCGTTGAACCT</b><br><b>AATGCGCTATTAGCCAACCTTTATTCGGACCATGTTG</b><br><b>TTAGCCGGCT</b> AGTGGCGAGCAACCCAATGCGGTTAT<br>TTGTTATGCTACAAATTAAGCCTGGTCAATTAGCGTT<br>GGCCTGATTCAATTTCAACTGGCTCCCTCGGGG                 | ATGGGTTTTTCTCATATGAGCA <b>ACTCACTACCCGGC</b><br>AAGAAGGCCATAAAAGCAAATGAAAGCGGATGGATA<br>CCGAGTGACCAGCGAATCCCAGCTCGCTTGAACCTTA<br>ATGCGCTATTAGCCAACCTTTATTCGGACCATGTTGT<br>TAGC <b>CGGCT</b> AGTGGCGAGCAACCCAATGCGGTTAT<br>TGTTATGCTACAAATTAAGCCTGGTCAATTAGCGTTG<br>GCCTGATTCAATTTCAACTG                                                                                                                              |
| 2  | CAAATAAATCGGATTAATTCGCTTTATGAAAGCATT<br>CAATTGTGAAATGAAATTTGATTCACAAAACACCGA<br>AATTTGAAGCATAAACTAATCATG <b>CCCAACCGCACA</b><br><b>AATTTGTCTATTACATCTTATATACGTATTTCTTCA</b><br><b>AATGTTTCACTTTTTTTTGAACCTTAATATTCGGCTAT</b><br><b>TAAGCACTTAAATCCCAAGAAAATATAATCCCTTAT</b><br><b>GTTTTGGGTTTTCTTGCAAATACC</b> ACAAAACCGAGAG<br>GTAAATTAACAATTTAAGGCAAATTTAGTGACTG<br>TGTCTTCGTTTTCTATCTTTCCCTTATCAGCATCTGAT<br>TTGTCAAC | TCATG <b>CCCAACCGCACA</b> AAATTTGTCTATTACATCTTA<br>TATACGTATTTCTTCAAATGTTCCAACCTTTTTTGA<br>ACTTAATATTCGCGTATTAAGCACTTAAATCCCAAG<br>AAAAATAAATCCCTTATGTTTGGGTTTTCTTGCAA <b>AT-</b><br><b>ACC</b> ACAAAACCGAGAGCAAAATTAACAATTAACAAT<br>GGCAAATTTAGTGACTGTGTCTTCTGTTTTCTATCTTT<br>CCCTTANCAGCAT                                                                                                                         |
| 3  | TTCTGGAACTCATTAAAAAAGATTTTTTTTTTATCT<br>TTTCTACCTAATGACCATTTTTTCTCAGTGCATACTC<br>AGCAGACTTGATGCATAAGCCAC <b>TGGCTGAGGTCGG</b><br><b>GACTGAAAAGCAATCGTTGCTACAGCGCTCGTGTGC</b><br><b>ATACATACTCGTACATGGGGCTACAGGGAGCTAG</b><br><b>ACCCTCTATAATATTTAACTTTTT</b> CTGAAATATACA<br>CTTTTGTCTTGGCCAGCTCTGCGGTGGCATAGATT<br>TGGCTGCTCCTTTGCTTTAGTTGGGCAGTAAGTCAC<br>TTTCCAGAA                                                    | CGTTGCTACAGCGCTTCTGTGTCATACATACATCGT<br>ACATGGGGCTACAGGGNGCTAGACCCTCTATAATA<br>TTAACT <b>TTTTCT</b> GAAATATACACTCTTTGTCTTGG<br>CCAGCTCTGCGGTGGCATAGATTTGGCTGCTCCTTT<br>GCT                                                                                                                                                                                                                                           |
| 4  | GGTGTCAAGTTTAAATGCAAACGTAATTTGGATGCTG<br>TCATTTGCTACGTTTTTCATTTGTTTCGAAAAGTTGCTC<br>GGCCCTCCCGTTTTCCAGATGGAAT <b>CTGTG</b> CAGCATG<br><b>GCACCCCTGGCTTTGCCATTGACTTTTTGCTGCCAT</b><br><b>CCGTTCTGACGGACACTTCTGCCAGCTGCTCCAGAA</b><br><b>TCAGAATCTCAGCTCACAGCTCGAATCT</b> ACCCGGAA<br>TGCAAACGTTGCACAAATGCCAGTTTTTGTAAATGG<br>ACTCATTTTGGTAGCTGGCAGTTTTGTGATTTTCAA<br>ATTGGCATTGTGAC                                       | <b>TCTGTG</b> CAGCATGGCACCCCTGGCTGTTGCCATTGA<br>CTTTTGTGCTCCATCCGTTCTGACGGACACTTCTGCC<br>AGCTGCTCCAGAATCAGAATCTCAGCTCACAGCTCG<br><b>AATCT</b> ACCCGGAATGCAAACGTTGCACAAATGCCAG<br>TTTTGTTAATTTGGACTCATTTTGGTAGCTGGCAGTT<br>TGTGAANTGAAGNANANANNTCNCGNACGTTTGCA<br>TTCGGGTGATTNGCTGTGAGCTGAGATTCTGATTCT<br>TGGAGCA                                                                                                     |
| 7  | GAATAAATTCAGACTTTTCTAGCTGGATAAGCTCTA<br>CAATTTTCAAAGCAAAGCAGTCCCTTCAATAAAATA<br>AATTAACCTGTTTATACAAAATG <b>TCCACTTGTGG</b><br><b>GCTTTTTGTATATGTACGAACGA</b> AAAAATCTCGTT<br>TAATTTGCTCAAAGGAAAATTAATTTAGAGTGGCAATT<br>TTTTACAAGTTTCAAGGACCTACAGCCGATATAAAT<br>CTCAATAGGA                                                                                                                                                | AAATG <b>TCCACT</b> TGTTGGGCTTTTTTGTATATGTACG<br><b>AACGA</b> AAAAAATCTCGTTTTAATTTGCTCAAAGGAAAA<br>TTAATTAGAGTGGCAATTTTTTACAAGTTTCAAGGA<br>CCTACAGCCGAT                                                                                                                                                                                                                                                              |
| 8  | CAAAAAGTCCTAATCTGCAAGCATTATGAAGATAAG<br>ATTGGGAGGAAATGCTGAAGTGAATCAATTAATACTA<br>GATTAAGCGCTATTGTTATTGGAT <b>TTCTGAGTTAG</b><br><b>ATCCCTAAAGCTGTGAATTT</b> AAATCAAAGAAAACAT<br>GATGATATACAATAGCTTGGCTTAGCCTATCATAATC<br>ATATGAATAACAACTAGATTATTAAGTCCCTCAT<br>ATATATC                                                                                                                                                   | TTGTTATTGGAT <b>TTTTCT</b> GAGTTAGATCCCTAAAGCTG<br>TG <b>AATTT</b> AAATCAAAGAAAACATGATGATATACAAT<br>AGCTTGCTTAGCCTATCATAATCAAAA                                                                                                                                                                                                                                                                                      |
| 9  | AACTAACTTTAGTCGCCACTATCAGCCAGATGTTGG<br>CCTTACATTATGAATAACTCAAACGGATTAGCAGT<br>AGTCCCAAAAAGATACAGAAAATG <b>ATGCA</b> CAACTAA<br><b>CTTAAACTTGTAAAGATACAAATGTA</b> TCTTGGTAATT<br>TTCTCACTTTAAGAAGTGAATAAAGGGATAGTACTC<br>ATCGTATGATTACAAGATTATTTCTAACGGAAGCAT<br>ATTTGTGCAAA                                                                                                                                             | ACAGAAAATG <b>ATGCA</b> CAACTAACTTAACTTGTAA<br>AGATACAA <b>ATGTA</b> TCTTGTAAATTTCTCACTTTAAG<br>AACTGAAAATAAGGGATAGTACTCATCGTATGATTAC<br>AAGATTATTTCTAACGGAAGCATATTTGTGCANANN<br>NTAANAATATCATATTTCCAGNCGCNTTTTTGGNCTT<br>NTATTATGAATCCTCTNNGATTTAGACTANTCCAAA<br>ANATANGAAAATGCATGCAAACCTAACTAAATNGTA<br>AAGATAAAAATGATCTTGGTAATTTTCTCCTTTAAG<br>AACTGAAAATAAGGGATAGTACTCATNTATGATTACA<br>ANATTATTTCTAACGGANGCATATT |
| 11 | ACTCGAGAAAACAACAACCTCAGCCGATCAAAGGCCA<br>TCAAAATTAATAATCTCGTATGGAAAATGGAAAATTT<br>GATGCAAACGTAGAGATAGATTTTT <b>TACGGCGGCTGG</b><br><b>CTGAAAAGTGTTTTTATTAGTGAATGGAAACGGACT</b><br><b>TTTTAATTGAAATCATCTTGAATGAAGACCGTGGTA</b><br>ATGTGTTGATTTCAATTTCCGGTGGCCCAGCCAAAGAT<br>CATAAAAGCCATCATGCATGCATCCCCCCTTT<br>TAATGACACTATCTACAAAGCAT                                                                                   | ATGCAACGTAGAGATAGATTTT <b>TACGGTGGTA</b> ATGT<br>GTTGATTTTCAATTTCCGGTGGCCCAGCCAAAGATCATA<br>AAAGCCATCATGCATGCATGCATCCCCCCTTTAAT<br>GACACTATCTACAAAGCAAAAGT                                                                                                                                                                                                                                                           |
| 17 | CAAAGCGTAATTAGTTTTCAACCAGTGCAATTCGACA<br>TGACATCTTACATGGTGAATAAAAAATTTAGCTATTT<br>TTTTATTCGTTTTACCATATACT <b>ATATTTTAAATGT</b><br><b>TAAACATAAATATTGGTAT</b> AGATTTCGATCTGCATTT<br>TTAAAGCAATTAAGTAAATAGGAAGGATAAACATGCC<br>TACGTTCTGTTTTAAATGCCAAATGTAATAAATATT<br>TCAAAA                                                                                                                                               | TATACT <b>ATATTTGGTAT</b> AGATTTCGATCTGCATTTTAA<br>AGCAATTAAGTAAATAGGAAGGATAAACATGCCTACG<br>TTCTGTTTTAAATGCCAAAAN                                                                                                                                                                                                                                                                                                    |
